# Supplementary material
Source: Springer Nature journal article supplement (https://www.springermedizin.de/resource/supplementary/12958_2003_33_MOESM2_ESM.pdf/9566226)

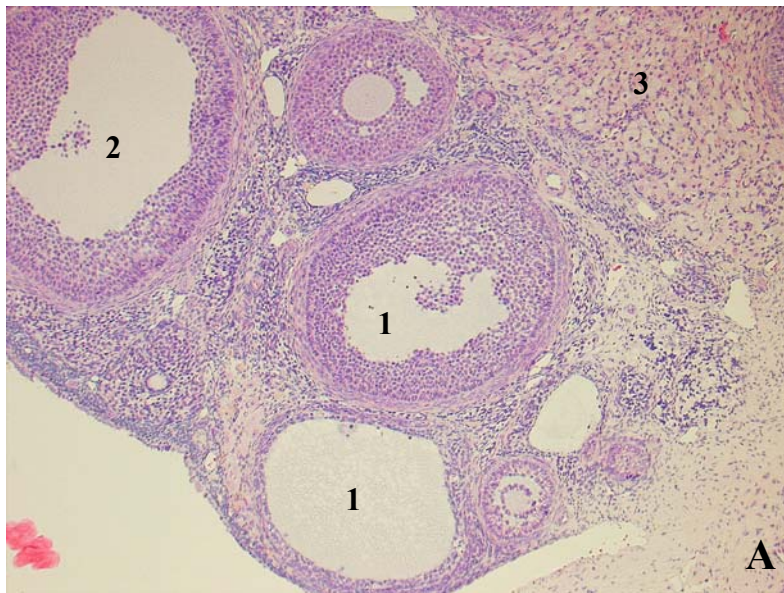

x10

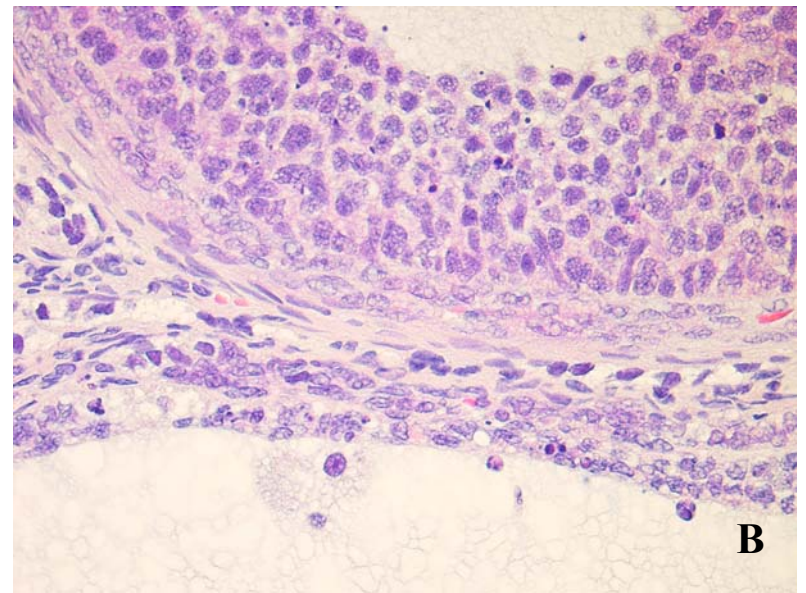

x60

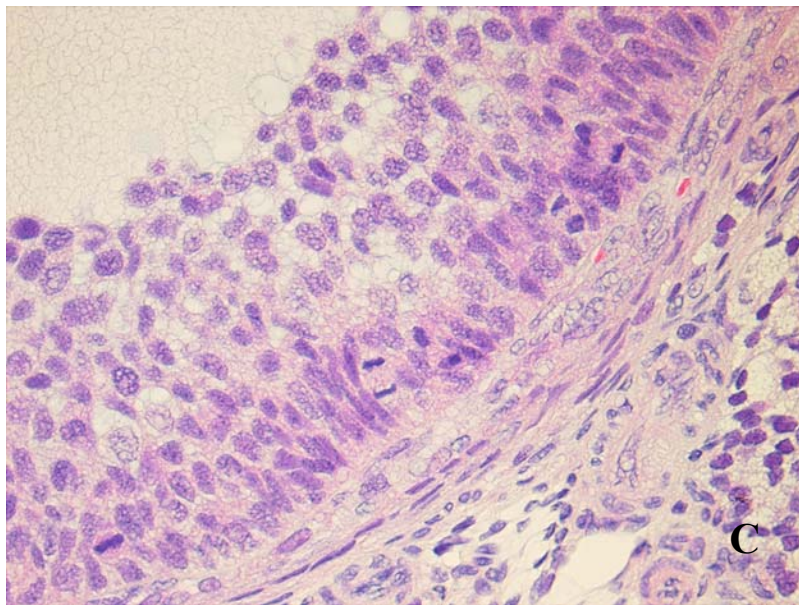

x60

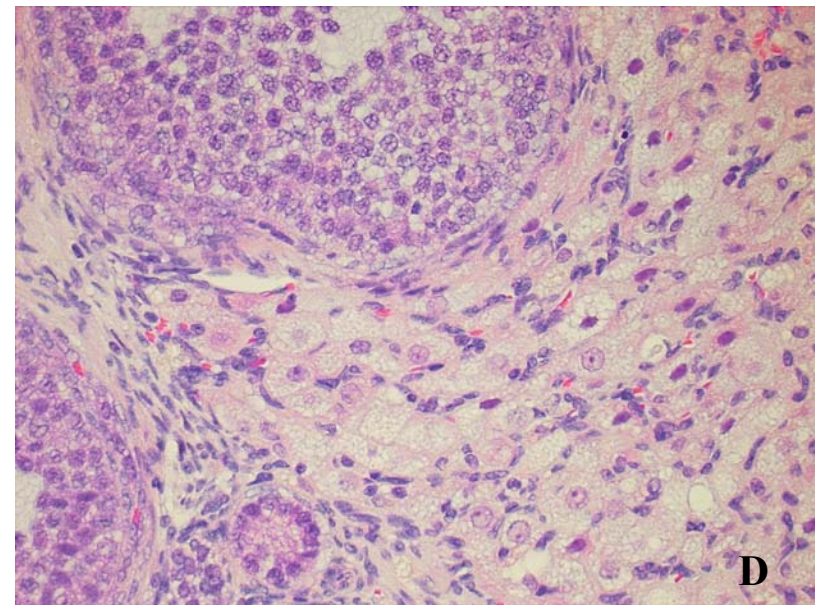

x40

PCO rat receiving EA

Supplement: MOESM2 [file 9566226]
